# Supplementary material
Source: PubMed Central journal article supplement (PMC3295015)

## SUPPLEMENTARY FIGURE LEGENDS

**Supplementary figure 1.** Protein sequence alignment of human TOB1 and TOB2 proteins.

Different symbols denote the specific mutations introduced into wild-type proteins. Red line  
5 underlines PAM2 motifs.

**Supplementary figure 2.** Secondary structure prediction of TOB1 wild-type vs. TM mutant.

The analysis indicates no apparent change in the predicted secondary structures between wild-  
type and TM mutant.

10

**Supplementary figure 3.** The ability of TOBs to promote deadenylation and decay is not  
affected by the phosphorylation status of three conserved serines during G0 to G1 transition.

(A) Northern blot analyses of deadenylation and decay of reporter transcript (BBB+12bs

mRNA) in cells expressing MS2, MS2-TOB1, MS2-TOB2, or the 3SA and 3SE mutants of the

15 MS2-TOBs. Cell transfection and poly(A)<sup>-</sup> mRNA (A<sup>-</sup>) preparation were as described in the

Fig. 1 legend. Cells were cultured in medium with 0.5% serum for 24 hours prior to serum

stimulation. Following serum stimulation, samples were taken at the indicated times after

tetracycline addition. (B) Western blot analysis of protein levels for MS2-TOBs and their

mutant derivatives, with GAPDH served as loading control. mRNA half-life ( $t_{1/2}$ )

20 determination is described under Materials and Methods section.





**A**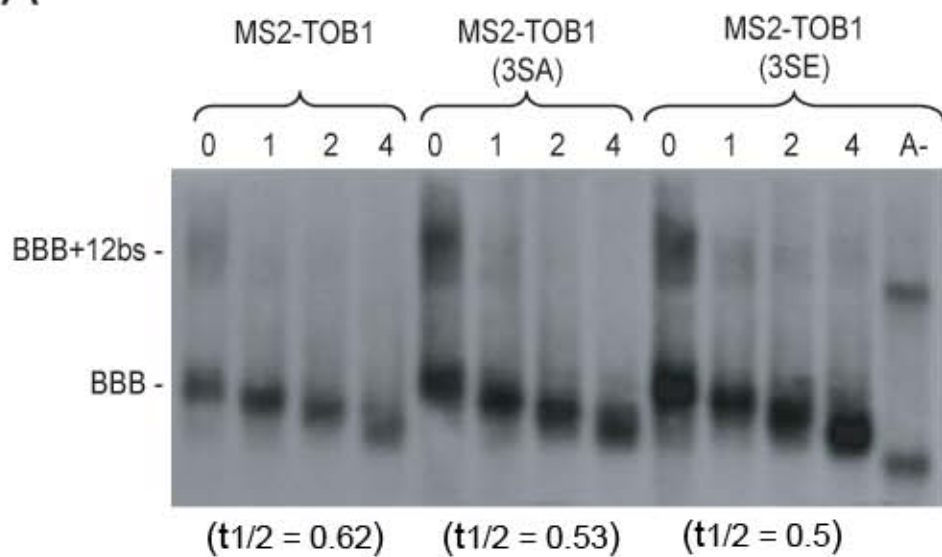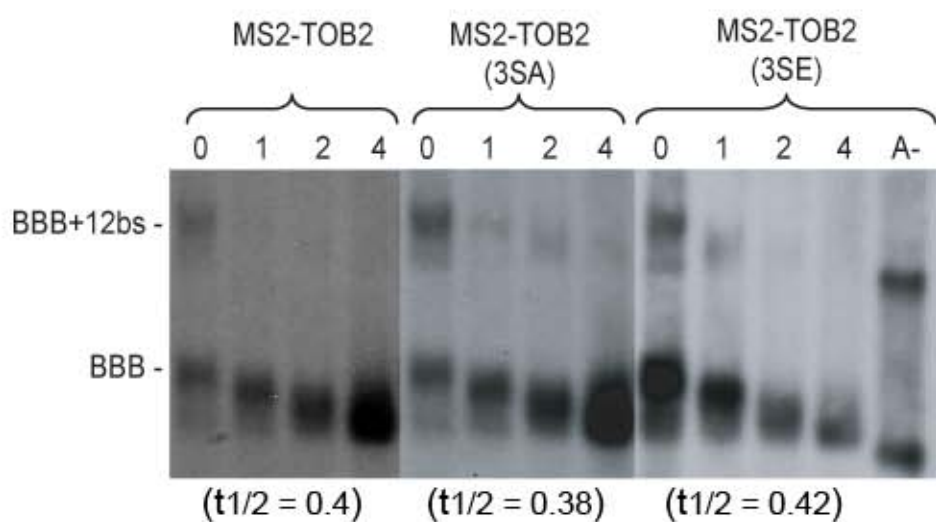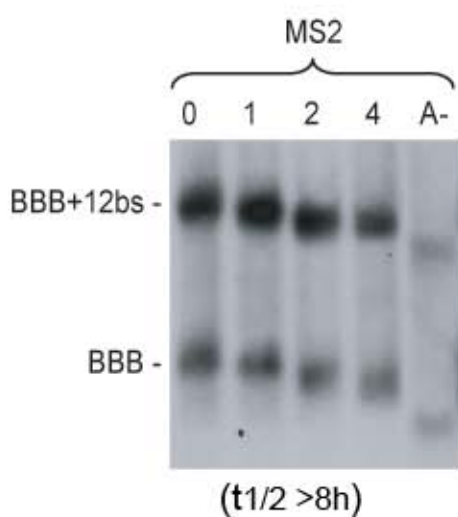**B**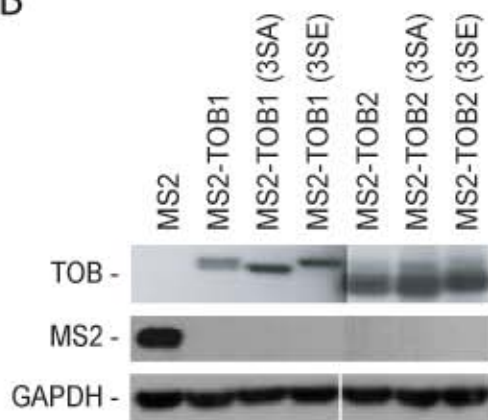

Supplement: supp_32.6.1089_MCB-MCB06370-11-s01.pdf [file supp_32.6.1089_MCB-MCB06370-11-s01.pdf]
